# Supplementary material for: Preoperative physiological reserve surrogate markers predict short-term adverse postoperative outcomes in cancer patients: a cross-sectional study
Source: Research Square preprint supplement (doi:10.21203/rs.3.rs-6901133/v1), 2025-08-05
Supplement: Supplementary file 1 [file 0283060db92f2f7fce971bff.docx]

**SUPPLEMENTARY MATERIAL**

| **Supplementary Table 1**  Logistic binary regression model analysis of factors associated with postoperative outcomes after surgery in patients with gastric and head and neck cancer (*n* = 125) | | | | | | | | | | | | | | | | | | |
| --- | --- | --- | --- | --- | --- | --- | --- | --- | --- | --- | --- | --- | --- | --- | --- | --- | --- | --- |
| **Variable** | **Postoperative complications**  **(n = 45)a** | | | **Needed for ICU**  **(n = 58)b** | | | **Length of stay (>10 days)**  **(n = 56)c** | | | **30-days readmission**  **(n = 29)d** | | | **30-days reintervention**  **(n = 19)e** | | | **Postoperative burden**  **(n = 75)f** | | |
| **OR** | **95% CI** | ***p* value** | **OR** | **95% CI** | ***p* value** | **OR** | **95% CI** | ***p* value** | **OR** | **95% CI** | ***p* value** | **OR** | **95% CI** | ***p* value** | **OR** | **95% CI** | ***p* value** |
| **Physical activity levels** |  |  |  |  |  |  |  |  |  |  |  |  |  |  |  |  |  |  |
| High and moderate (n = 62) |  |  |  | 1 |  |  |  |  |  |  |  |  |  |  |  |  |  |  |
| Low (n = 63) |  |  |  |  |  |  |  |  |  |  |  |  |  |  |  |  |  |  |
| Unadjusted |  |  |  | **2.42** | **(1.18-4.98)** | **0.016** |  |  |  |  |  |  |  |  |  |  |  |  |
| Adjusted |  |  |  | **2.34** | **(1.03-5.35)** | **0.043** |  |  |  |  |  |  |  |  |  |  |  |  |
| **Gait speed (categorized)** |  |  |  |  |  |  |  |  |  |  |  |  |  |  |  |  |  |  |
| ≥ 0.8 m/s (n = 109) |  |  |  |  |  |  |  |  |  | 1 |  |  | 1 |  |  |  |  |  |
| < 0.8 m/s (n = 16) |  |  |  |  |  |  |  |  |  |  |  |  |  |  |  |  |  |  |
| Unadjusted |  |  |  |  |  |  |  |  |  | **3.08** | **(1.03-9.17)** | **0.044** | 3.08 | (0.93-10.21) | 0.065 |  |  |  |
| Adjusted |  |  |  |  |  |  |  |  |  | 3.07 | (0.89-10.53) | 0.075 | **5.22** | **(1.23-22.19)** | **0.025** |  |  |  |
| **Probable sarcopenia** |  |  |  |  |  |  |  |  |  |  |  |  |  |  |  |  |  |  |
| No (n = 99) | 1 |  |  | 1 |  |  | 1 |  |  |  |  |  |  |  |  | 1 |  |  |
| Yes (n = 26) |  |  |  |  |  |  |  |  |  |  |  |  |  |  |  |  |  |  |
| Unadjusted | **2.56** | **(1.06-6.17)** | **0.036** | **2.67** | **(1.08-6.58)** | **0.033** | **2.91** | **(1.18-7.17)** | **0.021** |  |  |  |  |  |  | 2.67 | (0.99-7.21) | 0.053 |
| Adjusted | 2.26 | (0.85-6.03) | 0.104 | 2.62 | (0.96-7.14) | 0.059 | **3.18** | **(1.15-8.81)** | **0.026** |  |  |  |  |  |  | 2.34 | (0.82-6.70) | 0.113 |
| **Frailty phenotype** |  |  |  |  |  |  |  |  |  |  |  |  |  |  |  |  |  |  |
| Robust (n = 30) |  |  |  | 1 |  |  |  |  |  |  |  |  |  |  |  | 1 |  |  |
| Prefrail and frail (n = 95) |  |  |  |  |  |  |  |  |  |  |  |  |  |  |  |  |  |  |
| Unadjusted |  |  |  | **3.81** | **(1.49-9.72)** | **0.005** |  |  |  |  |  |  |  |  |  | **3.57** | **(1.51-8.41)** | **0.004** |
| Adjusted |  |  |  | **5.73** | **(1.79-18.34)** | **0.003** |  |  |  |  |  |  |  |  |  | **4.58** | **(1.60-13.08)** | **0.004** |

aAbbreviations: ICU, intermediate care unit; OR, odds ratio; CI, confidence interval

(a) Adjusted for age (categorized), weight loss (categorized), comorbidities (categorized), and tumor stage

(b) Adjusted for sex, weight loss (categorized), BMI (categorized), MUST score, tumor stage, and tumor type

(c) Adjusted for sex, weight loss (categorized), MUST score, tumor stage, and tumor type

(d) Adjusted for MUST score, neoadjuvant therapy, tumor stage, and tumor type

(e) Adjusted for sex, neoadjuvant therapy, and tumor type

(f) Adjusted for sex, weight loss (categorized), MUST score, and tumor stage

bBold = statistically significant, *p* < 0.05
